# Supplementary material
Source: PubMed Central journal article supplement (PMC3276661)
Supplement: mmc1.pdf [file mmc1.pdf]

Supplementary Data

***RHBDF2* Mutations Are Associated with Tylosis,  
a Familial Esophageal Cancer Syndrome**

Diana C. Blaydon, Sarah L. Etheridge, Janet M. Risk, Hans-Christian Hennies, Laura J. Gay Rebecca Carroll, Vincent Plagnol Fiona E McDonald, Howard P. Stevens, Nigel K. Spurr, D. Timothy Bishop, Anthony Ellis, Janusz Jankowski, John K. Field, Irene M. Leigh, Andrew P. South, and David P. Kelsell

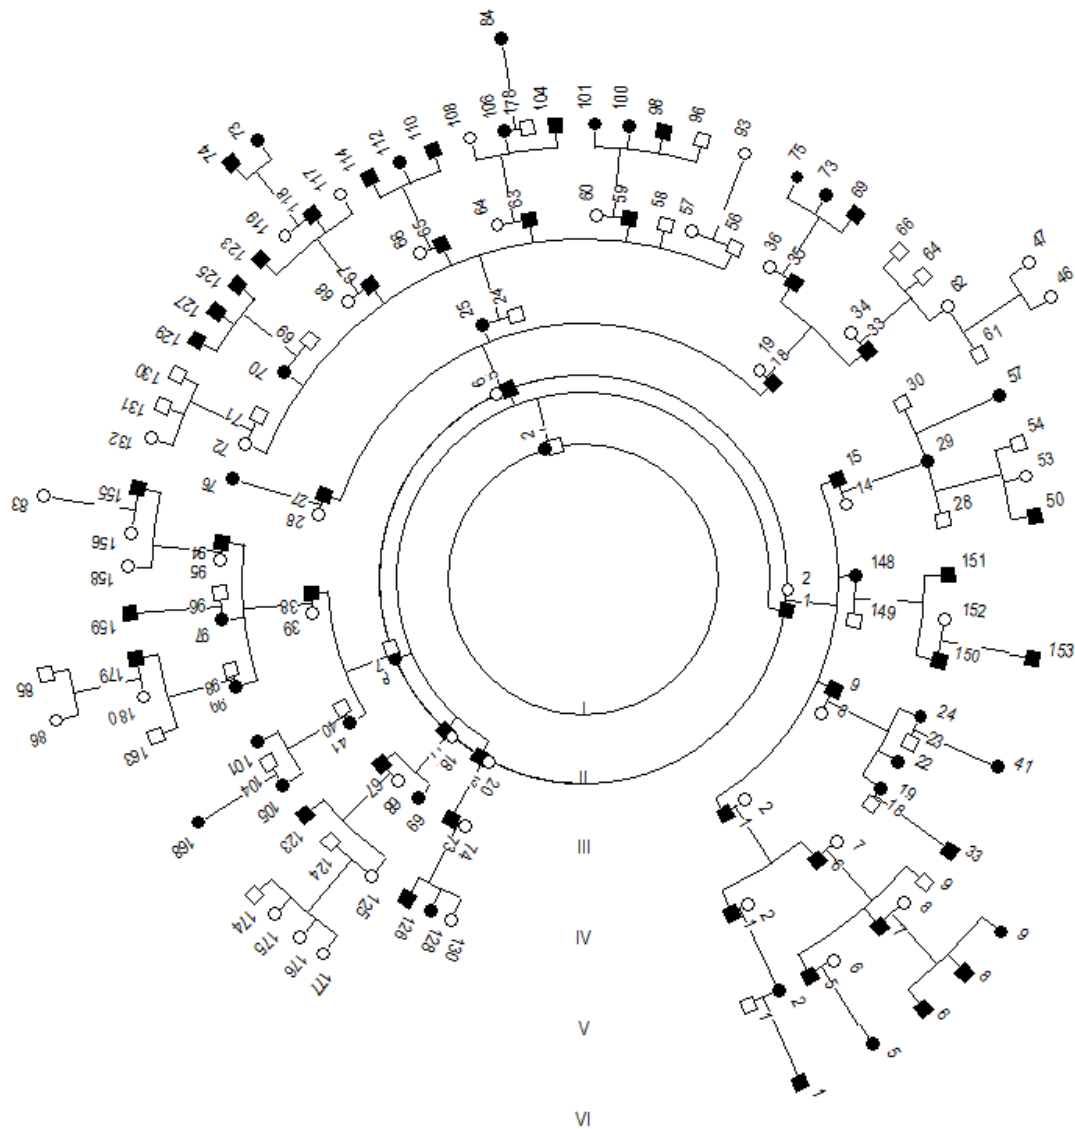

**Figure S1. A Subset of the UK Tylosis Family**

Schematic showing a subset of the extensive UK Tylosis family that are in current contact with the study. Closed symbols indicate those affected with Tylosis.



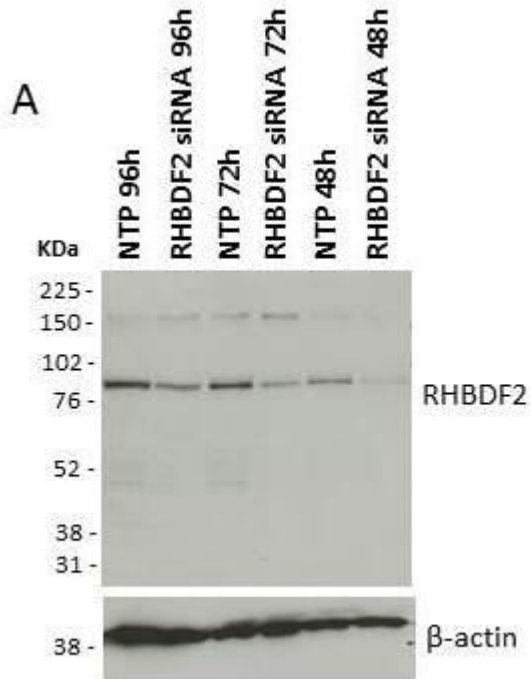

**Figure S3. Immunoblot Illustrating  $\alpha$ -RHBDF2 Antibody Specificity**

Immunoblot of lysates collected from Neb1 keratinocyte cells transfected with RHBDF2 siRNA, or a non-targetting pool (NTP) of siRNA after 48 h, 72 h and 96 h and probed using the rabbit polyclonal anti-RHBDF2 antibody (Sigma, HPA018080). Anti- $\beta$ -actin is used to demonstrate equal loading.

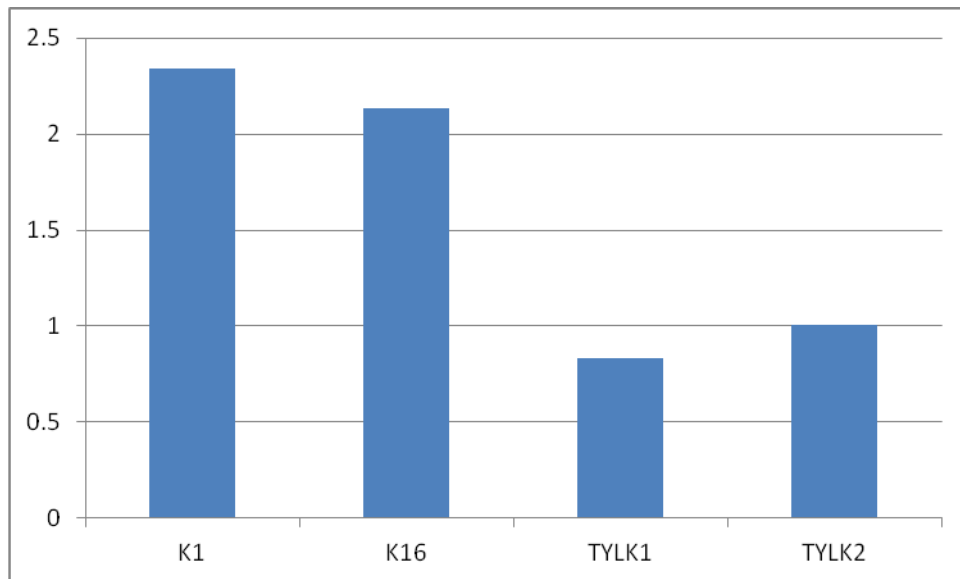

**Figure S4. Quantification of Total EGFR Levels Relative to Anti- $\beta$ -actin (from data in Fig. 3A)**

Quantification of Western blots of lysates from control cells, K1 and K16, and tylotic cells, TYLK1 and TYLK2, blotted with anti-EGFR (total), showing a reduction in the levels of total EGFR in the lysates from tylotic cells. Anti- $\beta$ -actin was used to demonstrate equal loading. Cells were grown in the absence of exogenous EGF.

**Table S1. Primers Used for Pyrosequencing Assay**

| Forward primer (biotin-labelled) | Reverse primer      | Pyrosequencing primer |
|----------------------------------|---------------------|-----------------------|
| GGACCCTAATGGCTCTGCTT             | ATGTCCATCTCCTCCGGGT | GCCAGCGGATCCACA       |

The PCR primers and a pyrosequencing primer (all shown 5'-3') were designed to cover the c.557T>C mutation site, in order to screen other members of the UK and US families for the presence of this mutation.
